# Supplementary material
Source: Springer Nature journal article supplement (https://www.springermedizin.de/resource/supplementary/13058_2005_1249_MOESM5_ESM.pdf/9698678)

**A.**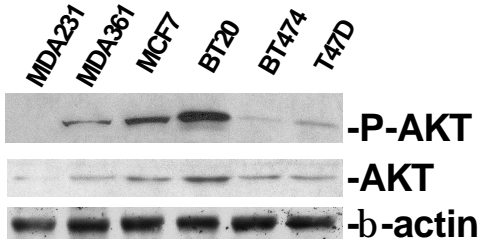**B.**

|        | SS    | SS+3 $\mu$ m | SS+10 $\mu$ m |
|--------|-------|--------------|---------------|
| MDA157 | 52.7% | 53.2%        | 53.5%         |
| MCF7   | 7.6%  | 14.8%        | 15.1%         |
| BT20   | 8.9%  | 10.6%        | 32.5%         |

**C.**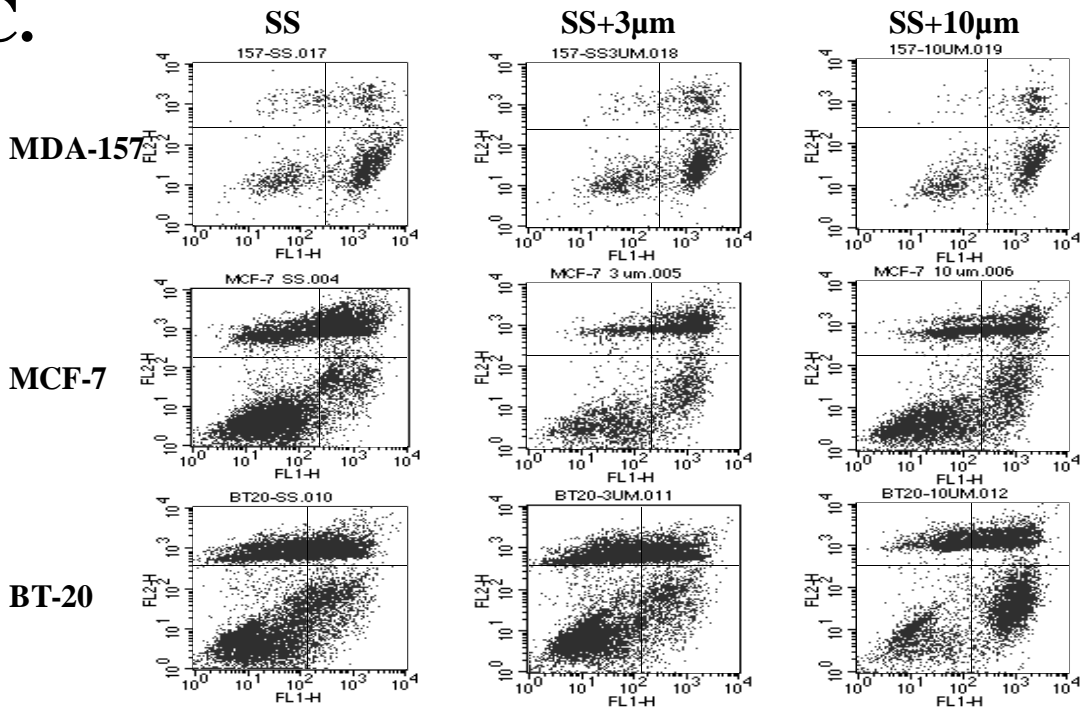

**Figure 4. Wu G et al.**

Supplement: MOESM5 [file 9698678]
